1           **Engineering a customizable antibacterial T6SS-based platform in**  
2                                           ***Vibrio natriegens***

3  
4                                           Biswanath Jana<sup>1</sup>, Kinga Keppel<sup>1</sup>, and Dor Salomon<sup>1,\*</sup>

5  
6       <sup>1</sup> Department of Clinical Microbiology and Immunology, Sackler Faculty of Medicine,  
7       Tel Aviv University, Tel Aviv 6997801, Israel.

8       \* For correspondence: dorsalomon@mail.tau.ac.il; Tel.: +972-3-6408583

9  
10  
11       **ABSTRACT**

12       Bacterial pathogens are a major risk to human, animal, and plant health. To counteract  
13       the spread of antibiotic resistance, alternative antibacterial strategies are urgently  
14       needed. Here, we constructed a proof-of-concept customizable, modular, and inducible  
15       antibacterial toxin delivery platform. By engineering a type VI secretion system (T6SS)  
16       that is controlled by an externally induced on/off switch, we transformed the safe  
17       bacterium, *Vibrio natriegens*, into an effective antibacterial weapon. Furthermore, we  
18       demonstrated that the delivered effector repertoire, and thus the toxicity range of this  
19       platform, can be easily manipulated and tested. We believe that this platform can serve  
20       as a foundation for novel antibacterial bio-treatments, as well as a unique tool to study  
21       antibacterial toxins.

## 22 INTRODUCTION

23 Owing to the rapid spread of multidrug-resistant bacteria and infections, as well as the  
24 lack of new effective antibiotics, we are quickly approaching a “post-antibiotic era” in  
25 which bacterial infections that are considered curable will once again be life threatening  
26 <sup>1,2</sup>. Misuse and over-use of antibiotics in medicine and in animal agriculture are thought  
27 to have contributed to the emergence of antibiotic-resistant strains <sup>3–5</sup>. Moreover, global  
28 environmental changes have enabled the spread of bacterial pathogens and the  
29 emergence of new pathogenic strains, as described for members of the *Vibrionaceae*  
30 family <sup>6</sup>.

31 There is an urgent need to develop new antibacterial treatment strategies as alternatives  
32 to antibiotics to prevent and counteract the emerging threat from bacterial pathogens.  
33 Fortunately, the scientific community has accepted this challenge, and several  
34 antibacterial approaches have been developed in recent years to address this growing  
35 problem. Such approaches include, for example, phage-therapy <sup>7</sup>, bacteriocins <sup>8,9</sup>,  
36 customized toxins whose expression is induced upon delivery of their encoding DNA into  
37 the target pathogen <sup>10</sup>, and the use of genome-editing methods, such as CRISPR-Cas,  
38 to reverse bacterial resistance to antibiotics <sup>11,12</sup>. Although promising, each of these  
39 approaches has its limitations, such as reliance on specific receptors that are presented  
40 on the surface of the target cell, reliance on target cell machinery (i.e., transcription and  
41 translation) for activation, or a delivery mode against which bacteria can quickly develop  
42 resistance. Therefore, we cannot rely on a single antibacterial strategy if we wish to stay  
43 ahead in the “arms race” against bacterial pathogens.

44 Bacteria have been competing with each other over resources for eons <sup>13</sup>; thus, they have  
45 evolved sophisticated molecular weapons to eliminate their rivals. Many Gram-negative  
46 bacteria utilize a contact-dependent, protein secretion apparatus, termed the type VI  
47 secretion system (T6SS), to deliver toxic effector proteins into neighboring cells <sup>14–16</sup>.  
48 Although T6SSs were originally described as targeting eukaryotic cells <sup>15</sup>, it is now clear  
49 that most of them play a role in interbacterial competition <sup>17</sup>; they use brute force to deliver  
50 an arsenal of antibacterial effectors into competing, non-kin bacteria <sup>16</sup>. These  
51 antibacterial effectors are encoded in operons, together with cognate immunity proteins  
52 that protect against self- or kin-intoxication by directly binding to, and occluding the  
53 effector’s active site <sup>18</sup>.

54 T6SS’s ability to intoxicate diverse bacteria and to deliver an arsenal of toxic effectors  
55 that synergistically target conserved and essential bacterial components <sup>19</sup> has made it a  
56 lucrative, although yet largely untapped, antibacterial tool. Indeed, Ting and colleagues  
57 recently reported engineering “programmed inhibitor cells” that use surface-displayed  
58 nanobodies to specifically adhere to and intoxicate bacteria of choice in a mixed  
59 population via T6SS activity <sup>20</sup>. Their proof-of-concept system relies on the constitutively  
60 active T6SS of an opportunistic pathogen, *Enterobacter cloacae*, and on its natural  
61 repertoire of antibacterial effectors.

62 Here, we set out to create a novel proof-of-concept bio-treatment with inducible and  
63 customizable antibacterial properties. By introducing a T6SS into *Vibrio natriegens*, we  
64 armed this safe, non-pathogenic bacterium<sup>21–23</sup> with antibacterial capabilities. We  
65 modified T6SS so that it would serve as an inducible weapon by engineering an on/off  
66 switch that allows T6SS expression only in response to an external cue. Importantly, we  
67 demonstrated that by manipulating its effector payload, it is possible to alter the  
68 antibacterial activity and the toxicity range of this platform.

69

70

## 71 RESULTS

### 72 Introducing an antibacterial T6SS platform into *Vibrio natriegens*

73 In this work, our objective was to create an antibacterial bio-treatment that utilizes the  
74 advantages of T6SS. We envisioned that such a proof-of-concept T6SS platform should:  
75 1) be inducible and responsive to its environment; 2) be modular, thus allowing rapid  
76 customization; 3) allow the delivered effector payload to be manipulated in order to control  
77 the toxicity range; and 4) be installed in a non-pathogenic bacterium.

78 As a first step, we set out to determine whether we can transform a non-pathogenic  
79 bacterium lacking known antibacterial properties into an antibacterial strain by introducing  
80 an exogenous antibacterial T6SS into it. To this end, we chose *Vibrio natriegens* as the  
81 host for a T6SS-based platform; *V. natriegens* is a genetically tractable, safe marine  
82 bacterium that thrives under diverse environmental conditions<sup>21–23</sup>; it does not contain an  
83 endogenous T6SS<sup>24</sup>. For the T6SS-based platform, we chose *Vibrio parahaemolyticus*  
84 T6SS1 (hereafter referred to as VpT6SS1), an antibacterial T6SS that is encoded on a  
85 single gene cluster containing all the required core components for assembling a  
86 functional T6SS, as well as regulators and antibacterial effector and immunity modules  
87<sup>25–27</sup> (Fig. 1A). In *V. parahaemolyticus*, the system is activated under warm marine-like  
88 conditions (i.e., at 30 °C and 3% NaCl) including surface sensing activation<sup>25</sup>. Studies of  
89 VpT6SS1 and its homologs in several *Vibrio* strains have revealed diverse and dynamic  
90 effector repertoires that can be exploited to alter the delivered effector payload of this  
91 system<sup>24,26,28–31</sup>.

92 We cloned the VpT6SS1-encoding gene cluster from the *Vibrio parahaemolyticus* type  
93 strain RIMD 2210633 (*vp1386-vp1420*; GenBank: BA000031.2) into a low-copy plasmid  
94 (pCLTR), generating pT6SS1 (see the Materials and Methods section and [Supplementary](#)  
95 [Fig. S1](#) for details on plasmid construction), and introduced it into *Vibrio natriegens* ATCC  
96 14048. The plasmid-borne VpT6SS1 was functional in *V. natriegens* under warm marine-  
97 like conditions, as evident by secretion of the hallmark secreted component, VgrG1<sup>15</sup>  
98 (Fig. 1B). As we predicted, VpT6SS1 also equipped *V. natriegens* with the ability to  
99 outcompete its parental strain under warm marine-like conditions, consequently reducing  
100 by ~50-fold the number of viable prey bacteria remaining after 4 hours of competition (Fig.

101 **1C-D)**. Although the effect on prey viability was less dramatic than that of a *V.*  
 102 *parahaemolyticus* attacker, which carries additional VpT6SS1 effectors encoded outside  
 103 of the cluster<sup>26</sup>, this result indicates that a natural VpT6SS1 is functional in *V. natriegens*.

104

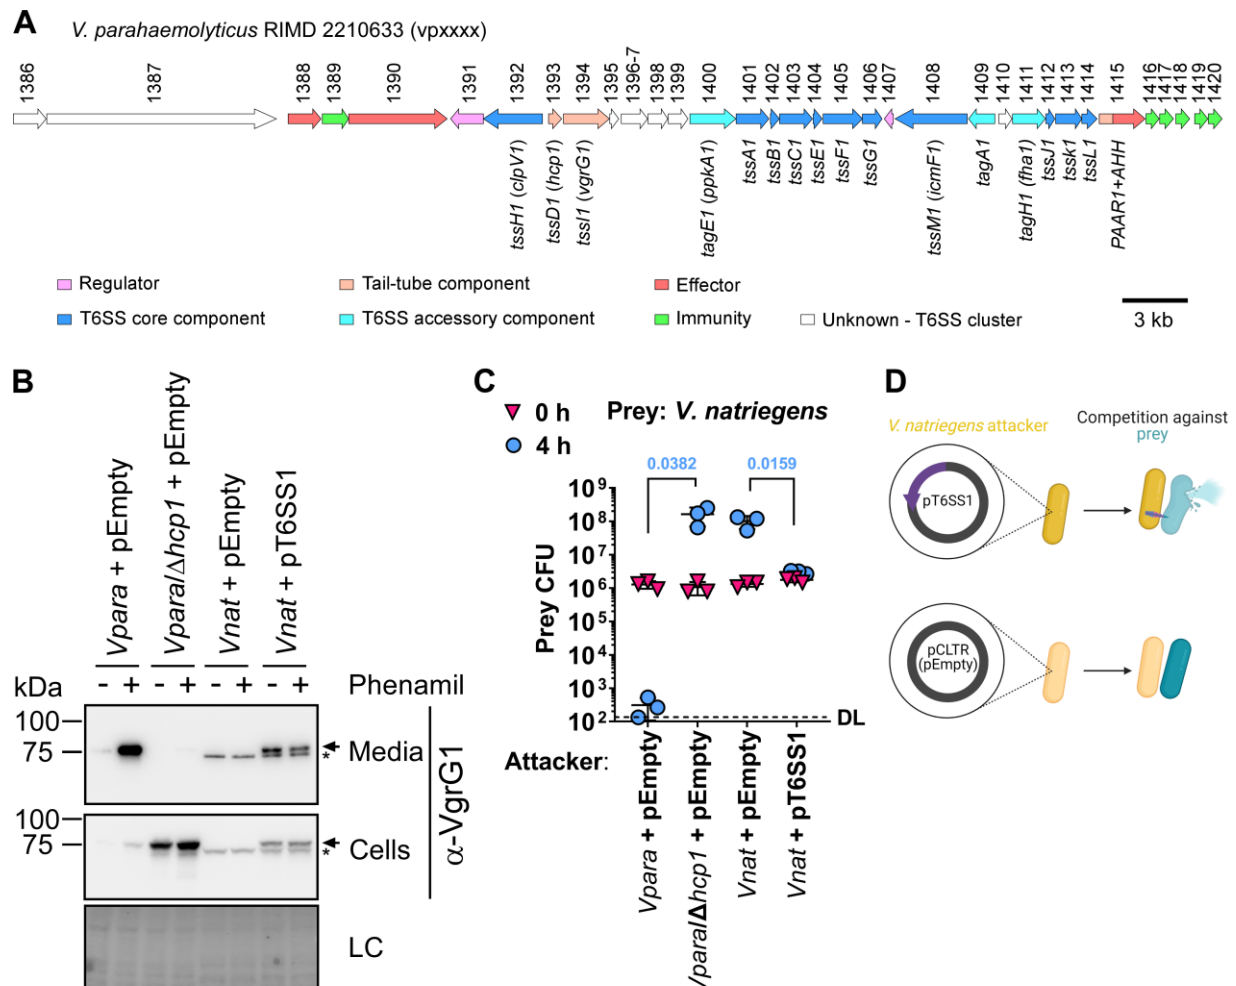

105 **Figure 1. VpT6SS1 is functional in *V. natriegens*.** **A)** Schematic representation of the *V.*  
 106 *parahaemolyticus* RIMD 2210633 T6SS1 gene cluster. Genes are represented by arrows  
 107 indicating the direction of transcription. Locus numbers (vpxxxx) are denoted above. Notable  
 108 T6SS components are denoted below. **B)** Expression (cells) and secretion (media) of VgrG1 from  
 109 *V. parahaemolyticus* RIMD 2210633 derivative POR1 (*Vpara*; T6SS1<sup>+</sup>) and its T6SS1<sup>-</sup> mutant  
 110 (*Vpara/Δhcp1*), and from *V. natriegens* (*Vnat*) carrying the indicated plasmids. Samples were  
 111 treated (+) or not (-) with 20 μM phenamil to activate surface sensing in media containing 3%  
 112 NaCl at 30 °C for 5 h. Loading control (LC) is shown for total protein lysates. Arrows denote bands  
 113 corresponding to VgrG1. Asterisks denote non-specific bands detected in *Vnat* samples. **C)**  
 114 Viability counts of *V. natriegens* prey before (0 h) and after (4 h) co-incubation with the indicated  
 115 attackers, as described in B, on media containing 3% NaCl at 30 °C. Data are shown as the mean  
 116 ± SD. Statistical significance between samples at the 4 h timepoint by an unpaired, two-tailed  
 117 Student's *t*-test is denoted above. A significant difference was considered as  $P < 0.05$ . DL, assay

118 detection limit. **D)** Illustration of interbacterial competition mediated by VpT6SS1 when introduced  
119 into *V. natriegens* (yellow) on a plasmid (pT6SS1), as shown in C. Prey cells are denoted in blue.

120

## 121 **Engineering an inducible on/off switch for VpT6SS1 in *V. natriegens***

122 Aiming to transform VpT6SS1 in *V. natriegens* into an inducible system that is controlled  
123 by an external cue, we sought to identify a gene that can serve as an on/off switch for  
124 VpT6SS1-mediated antibacterial activity. This required identifying a regulator whose  
125 deletion shuts off all or most of the VpT6SS1 genes; its expression should turn them back  
126 on. Three major positive regulators of VpT6SS1 have been identified previously in *V.*  
127 *parahaemolyticus* and were considered possible candidates: TfoY<sup>32,33</sup>, which is encoded  
128 outside of the VpT6SS1 cluster, and two regulators encoded within the cluster, VP1407  
129 and VP1391<sup>25,27,33</sup>.

130 Using a combination of quantitative real-time PCR (RT-PCR), interbacterial competitions,  
131 and VgrG1 secretion assays, we deciphered the role of the three regulators in the  
132 regulatory cascade of VpT6SS1 in *V. parahaemolyticus* ([Supplementary Fig. S2](#)).  
133 Importantly, we found that TfoY is an upstream regulator whose expression leads to  
134 upregulation of the *vp1409-7* operon encoding the regulator VP1407. VP1407, in turn,  
135 regulates all VpT6SS1 operons except *vp1393-9*, including its own operon. Lastly,  
136 VP1407-induced VP1391 upregulates the remaining *vp1393-9* operon to complete the  
137 VpT6SS1 activation ([Fig. 2A](#)).

138 In *V. natriegens*, TfoY (WP\_020332876.1; 89% identity to *V. parahaemolyticus* RIMD  
139 2210633 TfoY) could not be used as a switch, since it was not required for VpT6SS1  
140 activation ([Supplementary Fig. S3](#)). Therefore, we determined whether VP1407, whose  
141 deletion down-regulated all VpT6SS1 operons ([Supplementary Fig. S2B](#)) and whose  
142 expression induced all VpT6SS1 operons in *V. parahaemolyticus*, either directly or via  
143 VP1391 ([Supplementary Fig. S2A](#)), can serve as the on/off switch. Indeed, removing  
144 *vp1407* from the plasmid-borne VpT6SS1 (resulting in pT6SS1<sup>Ind</sup>) rendered the system  
145 inactive; it lost its ability to mediate interbacterial toxicity ([Fig. 2B](#)) and to express VgrG1  
146 ([Fig. 2C, no arabinose](#)).

147 To function as an on/off switch, VP1407's expression needed to be inducible. Moreover,  
148 we wanted VP1407 to be expressed *in trans* so that the platform will be modular and thus  
149 allow simple future customization. As proof-of-concept, we engineered *vp1407* into the  
150 *V. natriegens* chromosome (replacing the *dns* genomic locus<sup>22</sup>) under the regulation of  
151 the arabinose-inducible *Pbad* promoter, together with the *Pbad* regulator, AraC<sup>34</sup>; this  
152 resulted in a derivative strain that is hereafter termed *Vnat*<sup>R<sup>reg</sup></sup> ([Fig. 2D](#) and [Supplementary](#)  
153 [Fig. S1H](#)). As shown in [Fig. 2C](#), VgrG1 expression and secretion were restored when  
154 *Vnat*<sup>R<sup>reg</sup></sup> carrying pT6SS1<sup>Ind</sup> were grown in the presence of arabinose. Furthermore,  
155 VpT6SS1-mediated antibacterial toxicity was also restored upon arabinose addition ([Fig.](#)  
156 [2D-E](#)). Notably, the reduction in prey viability mediated by this inducible system (~3 orders  
157 of magnitude; [Fig. 2E](#)) was more pronounced than the reduction mediated by the natural



158 VpT6SS1 gene cluster in *V. natriegens* (~50-fold; Fig. 1C); these data reveal that external  
 159 activation of the system can result in potent antibacterial activity. Taken together, the  
 160 above results indicate that VP1407 can serve as an effective on/off switch for VpT6SS1.  
 161 Importantly, we demonstrated the successful construction of a *V. natriegens* strain that  
 162 can activate an engineered antibacterial platform upon sensing an external cue (Fig. 2D).  
 163

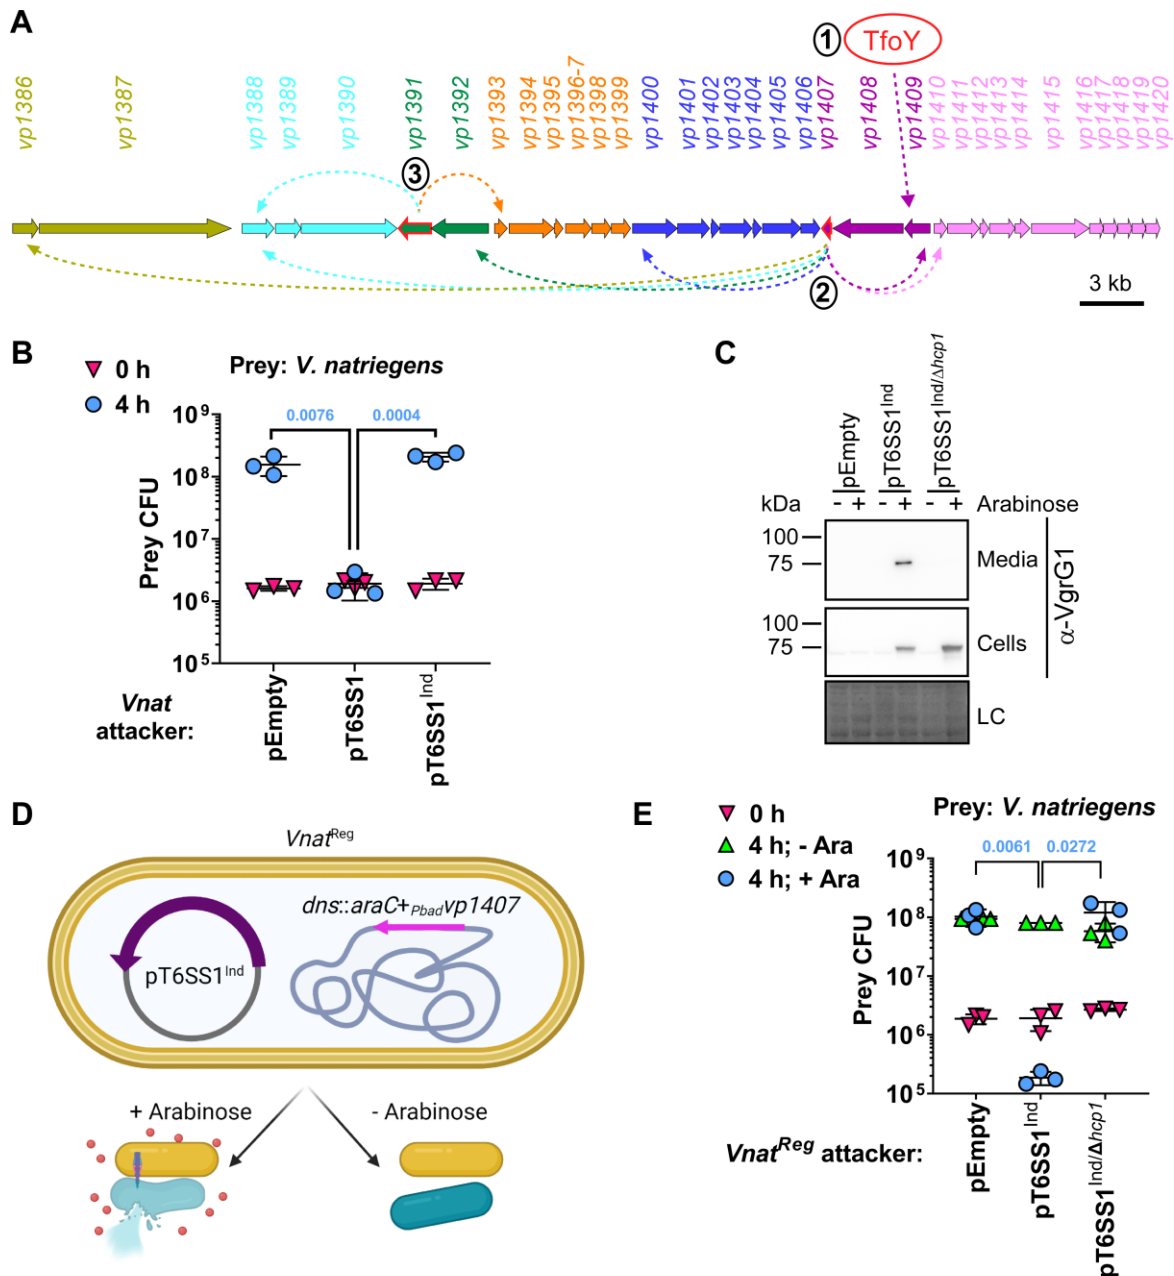

164 **Figure 2. VP1407 can serve as an effective on/off switch for VpT6SS1 in *V. natriegens*.** A)  
 165 Illustration of the VpT6SS1 (*vp1386-vp1420*) activation cascade. Genes are represented by  
 166 arrows indicating the direction of transcription. Genes belonging to the same operon are denoted  
 167 by the same color. Locus numbers (*vpxxxx*) are denoted above. Positive regulators are denoted

168 by a red frame. Dashed arrows denote transcriptional activation and are color coded according to  
169 the relevant induced operon. Numbers in black circles next to the positive regulators TfoY,  
170 VP1407, and VP1391 delineate the progression of the cascade. **B)** Viability counts of *V.*  
171 *natriegens* prey before (0 h) and after (4 h) co-incubation with wild type *V. natriegens* attackers  
172 harboring the indicated plasmids, on media containing 3% NaCl at 30 °C. **C)** Expression (cells)  
173 and secretion (media) of VgrG1 from *V. natriegens* containing an arabinose-inducible *vp1407* in  
174 the chromosomal *dns* locus (*Vnat*<sup>R<sup>reg</sup></sup>) and harboring an empty plasmid (pEmpty) or plasmids  
175 containing VpT6SS1 that lacks *vp1407* (pT6SS1<sup>Ind</sup>) or both *vp1407* and *hcp1* (pT6SS1<sup>Ind/Δhcp1</sup>;  
176 T6SS<sup>-</sup>). Samples were grown in media containing 3% NaCl and either supplemented (+) or not (-  
177 ) with 0.1% arabinose (Ara) at 30 °C. Loading control (LC) is shown for total protein lysates. **D)**  
178 Illustration of the engineered *Vnat*<sup>R<sup>reg</sup></sup> (yellow bacteria) containing a plasmid-borne, inducible  
179 VpT6SS1 (pT6SS1<sup>Ind</sup>). In the presence of arabinose (red circles), VP1407 is expressed from the  
180 chromosome and the plasmid-borne T6SS is induced, resulting in T6SS-mediated intoxication of  
181 adjacent prey bacteria (blue). **E)** Viability counts of *V. natriegens* prey before (0 h) and after (4 h)  
182 co-incubation with *Vnat*<sup>R<sup>reg</sup></sup> attackers carrying the indicated plasmids on solid media plates, as  
183 described in C. For B and E, data are shown as the mean ± SD; statistical significance between  
184 samples at the 4 h timepoint by an unpaired, two-tailed Student's *t*-test is denoted above and is  
185 color coded to match the relevant samples. A significant difference was considered as  $P < 0.05$ .

186

## 187 **The engineered antibacterial platform is active under a wide temperature range and** 188 **against various competitors**

189 To evaluate the usability of the engineered antibacterial platform, we determined the  
190 temperature range in which it operates. Using parental *V. natriegens* as prey, we  
191 monitored prey viability after 4 and 24 hours of competition with *Vnat*<sup>R<sup>reg</sup></sup> attackers carrying  
192 an inducible T6SS (pT6SS1<sup>Ind</sup>) or its inactive version (pT6SS1<sup>Ind/Δhcp1</sup>), at temperatures  
193 ranging from 20 to 37 °C. As shown in [Fig. 3A](#), the system was active within the tested  
194 range, although at 20 °C it required 24 h to mediate an effect similar to that seen at other  
195 temperatures within 4 h. This was probably due to the slower growth of *V. natriegens* at  
196 this temperature ([Supplementary Fig. S4](#)).

197 Because *V. natriegens* is a marine bacterium, we reasoned that as a potential bio-  
198 treatment it will be most suited to intoxicate other marine bacteria. Many marine bacteria  
199 are known or emerging pathogens of humans and aquaculture produce <sup>35,36</sup>. Aquaculture  
200 produce, such as shrimp, are often farmed at temperatures around 28 °C <sup>37,38</sup>, an  
201 optimum temperature at which our platform functions well ([Fig. 3A](#)). Therefore, we  
202 evaluated whether the platform can intoxicate diverse marine pathogens at this  
203 temperature. Indeed, under inducing marine-like conditions (i.e., 28 °C, 3% NaCl, and in  
204 the presence of arabinose), *Vnat*<sup>R<sup>reg</sup></sup> carrying an arabinose-inducible T6SS outcompeted  
205 pathogenic *V. parahaemolyticus* strains (the shrimp pathogen 12-297/B <sup>31</sup> and the clinical  
206 isolate 04.2548 <sup>39</sup>), as well as the pathogens *V. vulnificus* and *Aeromonas jandaei* ([Fig.](#)  
207 [3B-E](#)). Notably, to avoid masking the activity of our platform by prey-mediated  
208 counterattacks, we inactivated potentially antibacterial T6SSs in a few of the competing

209 bacteria by deleting genes encoding the conserved T6SS components *hcp* or *tssB*<sup>40</sup>, as  
 210 indicated.

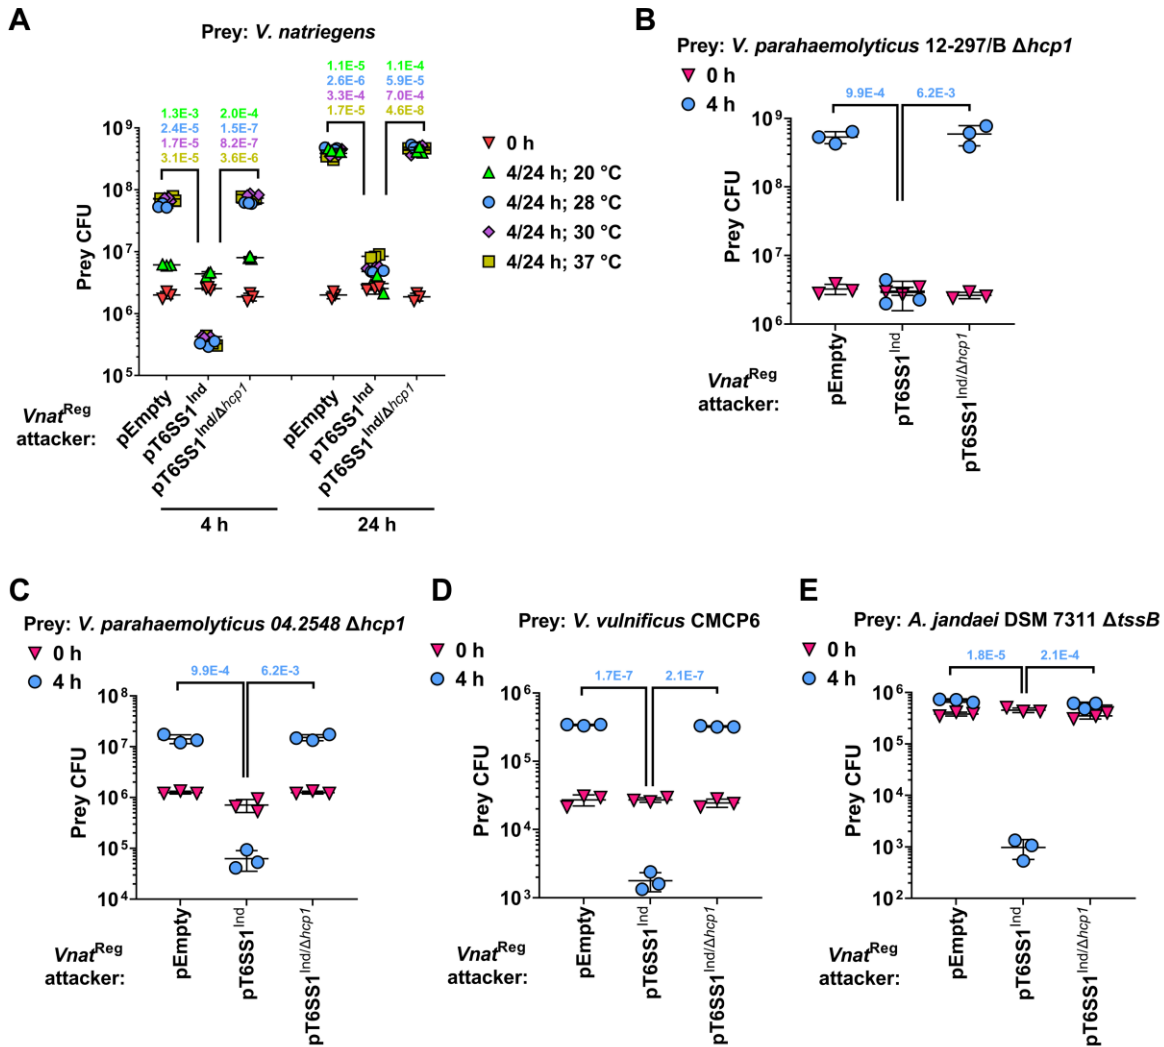

211 **Figure 3. A wide-range functionality of the inducible VpT6SS1-based platform in *V.***  
 212 ***natriegens*.** **A)** Viability counts of *V. natriegens* prey before (0 h) and after (4 or 24 h) co-  
 213 incubation with *Vnat*<sup>Reg</sup> attackers harboring the indicated plasmids, on media containing 3% NaCl  
 214 and 0.1% arabinose. **B-E)** Viability counts of the indicated prey bacteria before (0 h) and after (4  
 215 h) co-incubation with *Vnat*<sup>Reg</sup> attackers harboring the indicated plasmids, on media containing 3%  
 216 NaCl and 0.1% arabinose at 28 °C. Data are shown as the mean  $\pm$  SD. Statistical significance  
 217 between samples at the 4 or 24 h timepoints by an unpaired, two-tailed Student's *t*-test is denoted  
 218 above and is color coded to match the relevant samples. A significant difference was considered  
 219 as  $P < 0.05$ .

220

## 221 Manipulating the effector repertoire of the engineered platform

222 One of our main aims was to control not only the activation of the antibacterial platform,  
 223 but also the identity of the toxins that it deploys. The inducible T6SS platform that we



224 have engineered still carried two endogenous antibacterial effector and immunity  
225 modules, one at each end of the cluster (*vp1388-90* and *vp1415-6*)<sup>26</sup>, which mediate the  
226 intoxication of a wide range of bacteria (Fig. 3). To enable control of the effector repertoire,  
227 we first set out to remove the endogenous effectors from the platform. To this end, we  
228 constructed a version of pT6SS1<sup>Ind</sup> in which *vp1388-90* have been deleted and the two  
229 histidine residues in the putative active site of the AHH toxin domain (residues 563-4),  
230 which is fused to a PAAR repeat-containing domain in VP1415, have been replaced with  
231 alanines (hereafter referred to as pT6SS1<sup>Effectorless</sup>). As expected, this inducible and  
232 effectorless platform was unable to mediate arabinose-inducible intoxication of a sensitive  
233 prey (Supplementary Fig. S5A). Importantly, the effectorless T6SS remained functional,  
234 as evident by the T6SS-mediated secretion of VgrG1 (Supplementary Fig. S5B) and the  
235 assembly of T6SS sheaths (Supplementary Fig. S5C).

236 Next, we introduced into *Vnat*<sup>Reg</sup> that harbors the inducible and effectorless T6SS platform  
237 (pT6SS1<sup>Effectorless</sup>) various expression plasmids carrying T6SS effector and immunity  
238 modules that were placed under *Pbad* regulation. These modules were previously shown  
239 to be secreted by VpT6SS1 homologous systems (PoNe/i together with VgrG1b from *V.*  
240 *parahaemolyticus* 12-297/B<sup>28</sup>, Tme/i1 from *V. parahaemolyticus* BB22OP<sup>29</sup>, VPA1263-  
241 Vti2 from *V. parahaemolyticus* RIMD 2210633<sup>26</sup>, and Va02265-0 from *V. alginolyticus*  
242 12G01<sup>30</sup>). As expected, the exogenous effector and immunity modules restored the  
243 platform's ability to intoxicate parental *V. natriegens* prey. Surprisingly, however, each  
244 module differentially affected other bacteria that were used as prey (Fig. 4, left panels –  
245 “Single prey”). PoNe/i intoxicated all of the tested prey except *A. jandaei*, whereas the  
246 other three modules affected aquatic prey (i.e., *V. natriegens*, *V. vulnificus*, and *A.*  
247 *jandaei*) but not mammalian gut-residing bacteria (i.e., *E. coli* and *Salmonella enterica*)  
248 (Fig. 4). Interestingly, Tme/i1 had a major effect on vibrios, but it had only a minor effect  
249 on *A. jandaei* viability. These results show that the effector repertoire of the VpT6SS1-  
250 based platform can be manipulated. Intriguingly, these results also reveal that effectors  
251 have different toxicity ranges.

252 These findings prompted us to determine whether the differential toxicity of the tested  
253 effectors can enable selective targeting of specific bacteria within a mixed population.  
254 Indeed, the same phenomenon was observed when the five above-mentioned prey  
255 strains were all mixed together and competed against our platform (Fig. 4, right panels –  
256 “Mixed prey”), indicating that natural, exogenously expressed effectors can be used to  
257 target specific bacteria within a diverse prey community via T6SS activity.

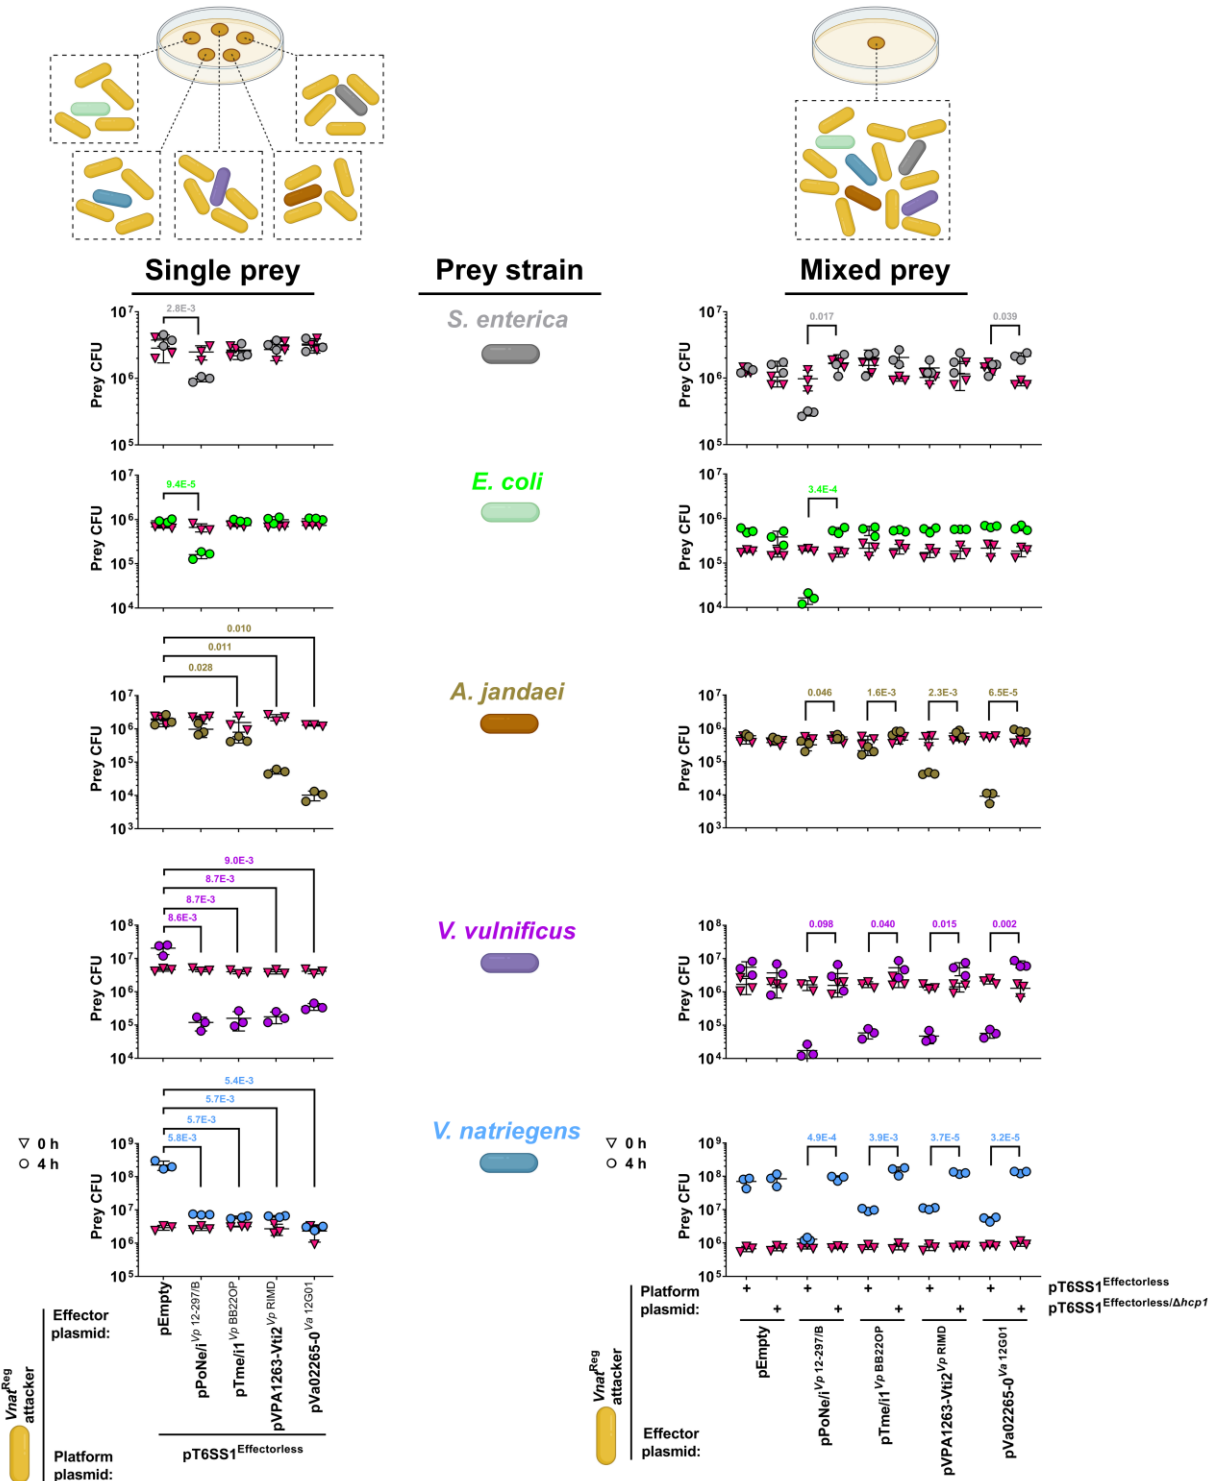

258 **Figure 4. Manipulating the effector repertoire and target range of the VpT6SS1-based**  
 259 **platform.** Viability counts of *V. natriegens* (cyan), *V. vulnificus* (purple), *A. jandaei*  $\Delta$ tssB (brown),  
 260 *E. coli* (green), and *S. enterica* (gray) prey before (0 h) and after (4 h) co-incubation with *Vnat*<sup>Reg</sup>  
 261 attackers (yellow) harboring the indicated plasmids, on media containing 3% NaCl at 28 °C. The  
 262 left panels show prey survival when competing alone (single prey) against the attacker at a 4:1  
 263 (attacker:prey) ratio; the right panels show the results of a competition experiment in which all

264 prey were mixed together with the attacker at a 10:1:1:1:1 (attacker:prey) ratio. Data are shown  
265 as the mean  $\pm$  SD. Statistical significance between samples at the 4 h timepoint by an unpaired,  
266 two-tailed Student's *t*-test is denoted above and is color coded to match the relevant samples. A  
267 significant difference was considered as  $P < 0.05$ .

268

## 269 **Deploying multiple effectors by the engineered platform**

270 Lastly, we set out to demonstrate that the engineered platform can deliver multiple  
271 exogenous effectors, and to determine the advantage of deploying multiple effectors to  
272 widen the platform's target range. To this end, we engineered a plasmid expressing a  
273 combination of two effectors: VPA1263<sup>26</sup> from *V. parahaemolyticus* RIMD 2210633, and  
274 Va02265<sup>30</sup> from *V. alginolyticus* 12G01, together with their cognate immunity genes to  
275 prevent self-intoxication. As expected, single effectors could mediate the intoxication of a  
276 prey that was not the strain from which they were derived. Nevertheless, their combination  
277 mediated T6SS-dependent intoxication of both prey strains (Fig. 5A-C). Notably,  
278 antibacterial T6SSs in the tested prey strains were inactivated (by deleting the conserved  
279 component *hcp*) to prevent counterattacks that could mask the effect of the engineered  
280 platform. Surprisingly, combining the two effector and immunity modules did not provide  
281 a significant advantage over a single module, when deployed against a prey that is  
282 sensitive to both effectors (i.e., *V. natriegens*) (Fig. 5D). These results demonstrate the  
283 ability of the engineered platform to deploy multiple effectors, as well as the applicability  
284 of using multiple effectors to widen its toxicity range.

285

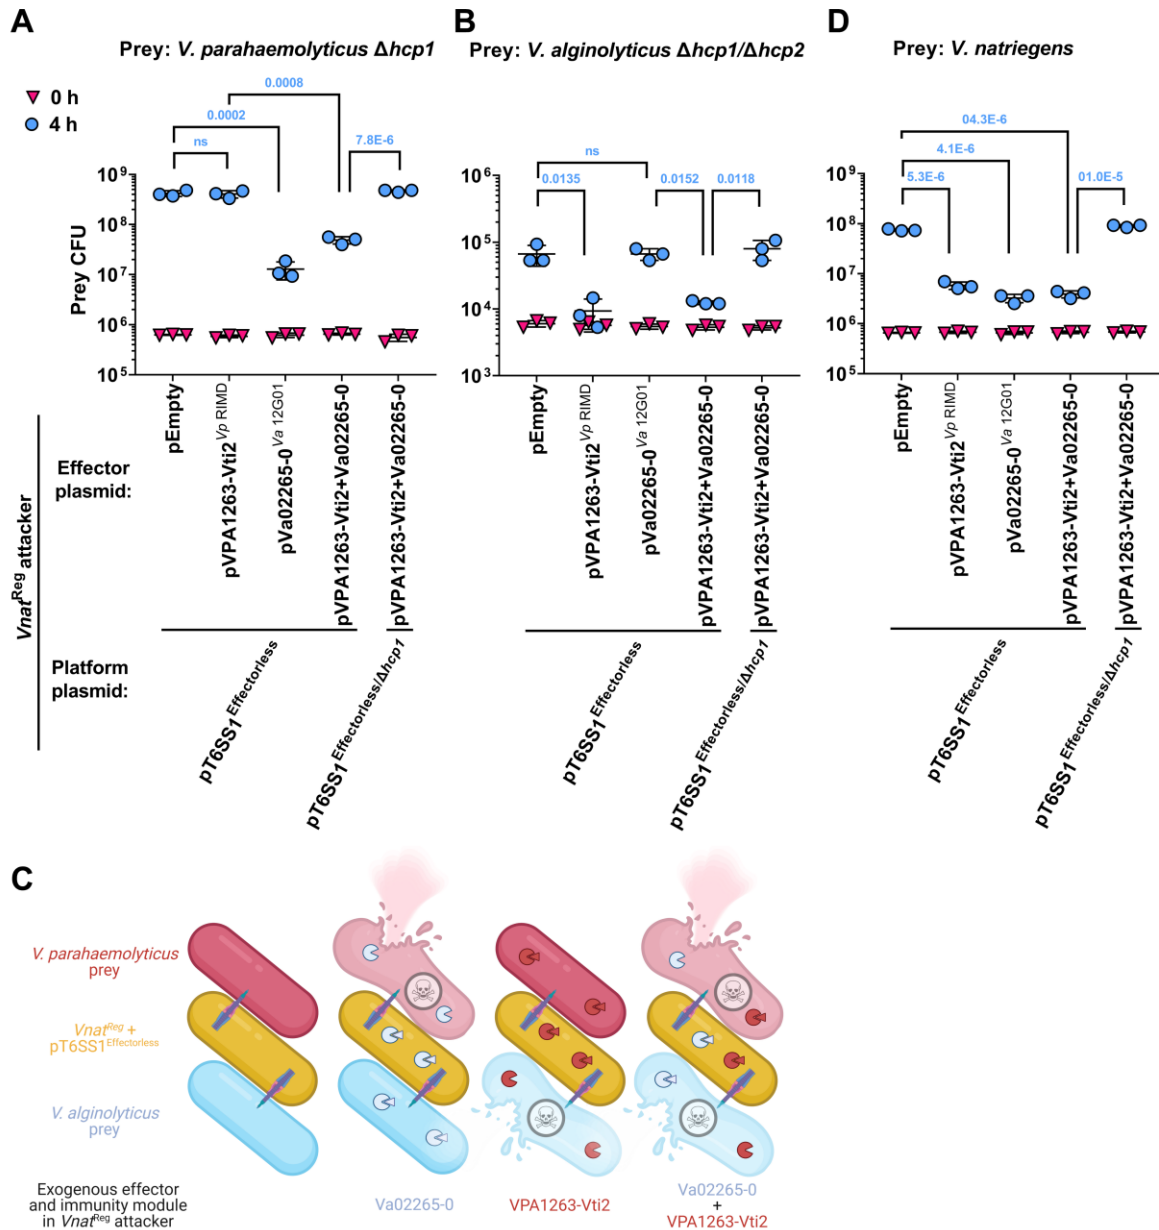

286 **Figure 5. Effector and immunity combinations alter the VpT6SS1-based platform's toxicity**  
 287 **range.** A-B and D) Viability counts of *V. parahaemolyticus* RIMD 2210633  $\Delta hcp1$  (A), *V.*  
 288 *alginolyticus* 12G01  $\Delta hcp1/\Delta hcp2$  (B), and *V. natriegens* (D) prey bacteria before (0 h) and after  
 289 (4 h) co-incubation with *VnaIReg* attackers harboring the indicated plasmids, on media containing  
 290 3% NaCl and 0.1% arabinose at 28 °C. Data are shown as the mean  $\pm$  SD. Statistical significance  
 291 between samples at the 4 h timepoint by an unpaired, two-tailed Student's *t*-test is denoted above.  
 292 A significant difference was considered as  $P < 0.05$ . C) Illustration summarizing the competitions  
 293 shown in A-B. Effector and immunity modules (denoted as a circle and a triangle, respectively)  
 294 expressed by *VnaIReg* carrying pT6SS1<sup>Effectorless</sup> (yellow) are colored to match the bacterium from  
 295 which they were derived.

296

297

298

## 299 DISCUSSION

300 This work presents a proof-of-concept engineered, modular bacterial platform for the  
301 controlled delivery of antibacterial effectors via T6SS. We propose that this platform can  
302 serve as a foundation for custom-designed, synthetic bio-treatments against bacterial  
303 pathogens. One of the platform's main advantages lies in its customizability; it can be  
304 engineered to respond to an external cue by modifying the regulation of an on/off switch,  
305 and its effector arsenal can also be manipulated. Moreover, an important attribute of this  
306 platform is its modularity. The effectorless T6SS-encoding gene cluster, which is inactive  
307 by itself (it lacks *vp1407*), is separated from the on/off switch and from the effector and  
308 immunity modules, both of which are provided *in trans*. This modularity simplifies future  
309 steps aimed at customizing the regulation of the platform and its effector repertoire, and  
310 thus its potential target range. Furthermore, this modular design takes into account the  
311 need to prevent future acquisition of this engineered system by other bacteria upon its  
312 deployment as a bio-treatment; the physical separation of its components should hinder  
313 acquisition of a complete and functional system by competitors via horizontal gene  
314 transfer.

315 We envision that this platform can be used as a specific pathogen-targeted bio-treatment  
316 upon further customization, taking under consideration the following themes: 1) the on/off  
317 switch should be induced upon sensing the pathogen to be targeted or the relevant niche,  
318 thus preventing purposeless activation of an energy-consuming apparatus. This can be  
319 achieved, for example, by appropriating the pathogen-of-target's quorum sensing  
320 regulation machinery to drive the expression of the platform's on/off switch; 2) the platform  
321 should be able to intoxicate only desired pathogens while remaining benign to other  
322 bacteria in order to avoid unwanted dysbiosis. This can be achieved by equipping it with  
323 effectors that exhibit target-specific toxicity, either natural or synthetic. Alternatively,  
324 specificity can be achieved by integrating this platform with adhesion-mediated targeting  
325 mechanisms. Ting et al. recently described such a method, in which a bacterium with  
326 antibacterial capabilities is selectively targeted to a pathogen of interest within a mixed  
327 community by surface-displayed nanobodies that mediate specific cell-cell adhesion<sup>20</sup>;  
328 3) the effector and immunity modules that will be introduced into the platform should be  
329 directly regulated by the T6SS on/off switch. This can be achieved by having them  
330 controlled by a promoter from a *VpT6SS1* operon that is directly upregulated by *VP1407*;  
331 4) a deployed bio-treatment should be safe. Here, the platform is hosted by *V. natriegens*,  
332 which is considered to be a safe, non-pathogenic bacterium<sup>23</sup>. Nevertheless, prior to its  
333 deployment, even this bacterium should be modified to limit its ability to acquire external  
334 genetic information that may include virulence factors, e.g., by hindering its natural  
335 competency machinery; 5) the deployed platform should be stable. Notably, in its current  
336 proof-of-concept state, parts of the platform are plasmid-borne. In future deployable  
337 versions, all of the modules should be introduced into the bacterial chromosome to ensure  
338 their long-term stability.



339 The current host for the platform, *V. natriegens*, can survive and grow under diverse  
340 conditions<sup>22</sup>. Since it is a natural inhabitant of marine environments<sup>41</sup>, we predict that it  
341 can serve as a bio-treatment in marine aquaculture settings. Towards this goal, we  
342 demonstrated that the platform is functional under conditions suitable for aquaculture  
343 farming, and that it is active against diverse marine pathogens. We predict that this or  
344 similar platforms can be integrated into diverse bacterial hosts that thrive in different  
345 environments, thus creating T6SS-based synthetic bio-treatments that can be used in an  
346 assortment of environmental and clinical setups.

347 In addition to its possible applicability as a bio-treatment, the effectorless platform also  
348 serves as a valuable research tool that can provide answers to basic questions in the  
349 T6SS field. For example, since single effectors can be introduced into the effectorless  
350 platform, the antibacterial effect of the attacking strain will be mediated solely by one  
351 effector. Therefore, the effector can be studied under the natural conditions in which it is  
352 delivered into diverse prey cells by T6SS, instead of being exogenously over-expressed  
353 inside a surrogate cell. Furthermore, the delivery of single effectors permits an analysis  
354 of the prey factors responsible for sensitivity or resistance. Here, we found that effectors  
355 can intoxicate certain bacterial prey, whereas they have no effect on other bacteria.  
356 Although this phenomenon could be useful to provide our platform with a narrow target  
357 range against specific bacterial pathogens, it also underscores the use of diverse effector  
358 arsenals by natural T6SSs to ensure intoxication of various competitors. However, it  
359 remains to be determined whether the observed lack of toxicity against certain bacteria  
360 is a property of an effector's activity, the ability of the T6SS to deliver the effector into  
361 certain prey, the environmental conditions under which the competition took place, or a  
362 property of the prey that renders it resistant to the activity of certain effectors. Notably,  
363 natural resistance of bacteria against T6SS effector intoxication, which is not mediated  
364 by cognate immunity proteins, has been recently reported in other studies<sup>42–45</sup>. Therefore,  
365 our platform serves as a unique tool that allows T6SS-mediated secretion of single  
366 effectors under a wide range of environmental conditions, enabling one to study effector  
367 toxicity ranges and revealing natural resistance mechanisms and strategies.

368 This platform can also be used to study effector synergy, a concept that was recently  
369 proposed by LaCourse et al.<sup>19</sup>. It allows deployment of multiple effectors of choice, and  
370 can be competed against different prey strains under diverse environmental conditions.  
371 The data that can be mined from such analyses, together with the above-mentioned  
372 effector target specificity, can be used when constructing a pathogen-oriented effector  
373 repertoire for a deployable bio-treatment.

374 In conclusion, we describe here the engineering of a bacterial platform that can be used  
375 to develop antibacterial bio-treatments. Upon future adaptation of its activation cues and  
376 optimization of its effector repertoire to allow specific recognition and targeting of a  
377 bacterial pathogen-of-interest, respectively, the efficiency of this platform and its ability to  
378 protect against bacterial infections will be tested *in vivo*.

379

380

## 381 MATERIALS AND METHODS

### 382 Strains and Media

383 For a complete list of strains used in this study, see [Supplementary Table S1](#). *Vibrio*  
384 *parahaemolyticus* and *Vibrio natriegens* were routinely grown in MLB media (Lysogeny  
385 broth [LB] containing 3% wt/vol NaCl) or on marine minimal media (MMM) agar plates  
386 (1.5% wt/vol agar, 2% wt/vol NaCl, 0.4% wt/vol galactose, 5 mM MgSO<sub>4</sub>, 7 mM K<sub>2</sub>SO<sub>4</sub>,  
387 77 mM K<sub>2</sub>HPO<sub>4</sub>, 35 mM KH<sub>2</sub>PO<sub>4</sub>, and 2 mM NH<sub>4</sub>Cl) at 30 °C. *Vibrio alginolyticus* were  
388 grown in MLB media and on MLB agar (1.5% wt/vol) plates at 30 °C. *Vibrio vulnificus*,  
389 *Aeromonas jandaei*, and *Salmonella enterica* were grown in LB media or on LB agar  
390 (1.5% wt/vol) plates. *V. vulnificus* and *A. jandaei* were grown at 30 °C, whereas *S. enterica*  
391 was grown at 37 °C. When *V. parahaemolyticus*, *V. alginolyticus*, *A. Jandaei*, or *V.*  
392 *natriegens* harbored a plasmid, chloramphenicol (10 µg/mL), kanamycin (250 µg/mL), or  
393 gentamycin (50 µg/mL) was added to the media to maintain the plasmid. *E. coli* were  
394 grown in 2xYT broth (1.6% wt/vol tryptone, 1% wt/vol yeast extract, and 0.5% wt/vol NaCl)  
395 at 37 °C. When *E. coli* harbored a plasmid, chloramphenicol (10 µg/mL), kanamycin (30  
396 µg/mL), erythromycin (250 µg/mL), or gentamycin (50 µg/mL) was added to the media to  
397 maintain the plasmid. When the expression of genes from an arabinose-inducible  
398 promoter was required, L-arabinose was added to the media at 0.1% wt/vol, as specified.

399 *Saccharomyces cerevisiae* MaV203 yeast were grown on yeast synthetic defined (SD)  
400 agar plates (0.67% wt/vol yeast nitrogen base without amino acids, 0.14% wt/vol yeast  
401 synthetic drop-out medium supplement, 2% wt/vol glucose, 0.01% wt/vol leucine, 0.002%  
402 wt/vol uracil, 0.002% wt/vol histidine, 0.002% wt/vol tryptophan, and 2% wt/vol agar) at  
403 30 °C.

404

### 405 Plasmid construction

406 For a complete list of plasmids used in this study, see [Supplementary Table S2](#). Primers  
407 used for amplification are listed in [Supplementary Table S3](#).

408 To construct pCLTR, a conjugatable, low-copy *E. coli*-yeast-*Vibrio* shuttle vector, a  
409 fragment consisting of the *p15A ori* and *Cm<sup>R</sup>* genes from pBAD33, and *oriT* from pUC18T-  
410 mini-Tn7T-Tp-dsRedExpress were PCR amplified and introduced into a linearized  
411 pYES1L plasmid (Novagen) using the Gibson assembly method <sup>46</sup> ([Supplementary Fig.](#)  
412 [S1A](#)).

413 For arabinose-inducible expression, the coding sequences (CDS) of *vp1391* and *vp1407*  
414 were amplified from *V. parahaemolyticus* POR1 genomic DNA and inserted into the  
415 multiple cloning site (MCS) of pBAD/*Myc*-His (Invitrogen) vector containing a kanamycin-  
416 resistance cassette <sup>25</sup> (in-frame or out-of-frame with the C-terminal *Myc*-His tag,

417 respectively), using the Gibson assembly method, to generate pVP1391 and pVP1407,  
418 respectively. The construction of pTfoY was described previously <sup>33</sup>.

419 For arabinose-inducible expression of TssB1-sfGFP or of effector and immunity modules  
420 in *V. natriegens*, these cassettes were first introduced into the above-mentioned  
421 pBAD/*Myc*-His. Effector and immunity modules were amplified from their respective  
422 encoding bacterium. For TssB1-sfGFP, *tssB1* (*vp1402*) and *sfgfp* were amplified from *V.*  
423 *parahaemolyticus* RIMD 2210633 genomic DNA and sfGFP-N1 (Addgene), respectively.  
424 The amplified cassettes were inserted into the pBAD/*Myc*-His MCS using the Gibson  
425 assembly method so that the 3' end is in-frame with the C-terminal *Myc*-His tag in the  
426 plasmid, except for Va02265-0 from *V. alginolyticus* 12G01. TssB1 and sfGFP were  
427 separated by a six-amino acid-long linker (AAAGGG). Next, the cassettes were amplified  
428 from pBAD/*Myc*-His (the region spanning the *Pbad* promoter to the *rnnT1* terminator) and  
429 inserted into pVSV209 <sup>47</sup>, replacing its *rfp*, *Cm<sup>R</sup>*, and *gfp* genes, using the Gibson  
430 assembly method (Supplementary Fig. S1B). The resulting plasmids were pPoNe/*iVp* <sup>12-</sup>  
431 <sup>27/B</sup>, pTme/*i1Vp* <sup>BB22OP</sup>, pVPA1263-Vti2<sup>Vp</sup> <sup>RIMD</sup>, pVa02265-0<sup>Va</sup> <sup>12G01</sup>, and pTssB1-sfGFP  
432 (collectively termed pEI-x in Supplementary Fig. S1B). To construct a plasmid with two  
433 effector and immunity modules (pVPA1263-Vti2+Va02265-0), the above-mentioned  
434 cassette containing Va02265-0 was amplified from pBAD/*Myc*-His (the region spanning  
435 the *Pbad* promoter to the *rnnT1* terminator) and inserted into pVPA1263-Vti2<sup>Vp</sup> <sup>RIMD</sup> at the  
436 3' end of the VPA1263-Vti2 cassette. As a control plasmid for these pVSV209-derived  
437 vectors, we used pBJ209-araC, which is a pVSV209 in which the *rfp-gfp* region was  
438 replaced with the region spanning the *araC* CDS to the *rnnT1* terminator from pBAD/*Myc*-  
439 His, using the Gibson assembly method.

440 pT6SS1, and its derivatives pT6SS1<sup>Ind</sup>, pT6SS1<sup>Ind/Δhcp1</sup>, pT6SS1<sup>Effectorless</sup>, and  
441 pT6SS1<sup>Effectorless/Δhcp1</sup> were constructed using the GeneArt High-Order Genetic Assembly  
442 System kit (Invitrogen), following the manufacturer's instructions with minor modifications.  
443 Briefly, VpT6SS1 (*vp1386-vp1420*) was divided into 6.5-10 kb fragments with overlapping  
444 ends (40-150 bp) to allow their union via homologous recombination in yeast. The  
445 overlapping fragments were PCR amplified individually from *V. parahaemolyticus*  
446 genomic DNA. Next, 200 ng of each PCR fragment were added to 200 ng of a linearized  
447 pCLTR backbone, after purification from an agarose gel using the Gel/PCR DNA  
448 Fragments Extraction kit (Geneaid), and the DNA mix was precipitated using the sodium  
449 acetate and ethanol method and washed twice with 70% ethanol. After having been air  
450 dried, the precipitated DNA was resuspended in 10 μL of Milli-Q-treated ultra-pure water  
451 and mixed with competent MaV203 yeast cells supplied with the kit. Transformed yeast  
452 were plated on SD agar plates lacking tryptophan, and then incubated for 2-3 days at 30  
453 °C. Colony PCR was performed on selected colonies to identify positive yeast colonies  
454 containing the desired construct. A positive yeast colony was scraped off a plate and  
455 lysed; then the lysate was used for electroporation into *E. coli* DH5α (λ pir). Lastly, the  
456 plasmid was transferred into *V. natriegens* via conjugation. To construct pT6SS1, *V.*  
457 *parahaemolyticus* POR1 genomic DNA was used as a template and the pCLTR backbone  
458 was linearized by restriction digestion with the I-SceI restriction enzyme (Supplementary

459 **Fig. S1C**). For pT6SS1<sup>Ind</sup>, *V. parahaemolyticus* POR1  $\Delta vp1407$ <sup>25</sup> genomic DNA was  
460 used as a template (**Supplementary Fig. S1D**); for pT6SS1<sup>Ind/ $\Delta hcp1$</sup> , both *V.*  
461 *parahaemolyticus* POR1  $\Delta vp1407$  and *V. parahaemolyticus* POR1  $\Delta hcp1$ <sup>25</sup> were used  
462 as templates (**Supplementary Fig. S1E**); for pT6SS1<sup>Effectorless</sup>, both *V. parahaemolyticus*  
463 POR1  $\Delta vp1407$  and *V. parahaemolyticus* POR1 *vp1415*<sup>AAA</sup> (see the description below)  
464 were used as templates (**Supplementary Fig. S1F**); for pT6SS1<sup>Effectorless/ $\Delta hcp1$</sup> , *V.*  
465 *parahaemolyticus* POR1  $\Delta vp1407$ , *V. parahaemolyticus* POR1  $\Delta hcp1$ , and *V.*  
466 *parahaemolyticus* POR1 *vp1415*<sup>AAA</sup> were used as templates (**Supplementary Fig. S1G**).  
467 For the four pT6SS1 derivatives, the linearized pCLTR backbone was PCR amplified from  
468 pT6SS1 to include the ends of VpT6SS1 so that longer regions of identity to the cluster  
469 fragments would be available for recombination.

470

### 471 **Construction of deletion and mutant strains**

472 To construct a *V. parahaemolyticus* POR1 derivative in which the putative active site of  
473 the VP1415 toxin is mutated (*vp1415*<sup>AAA</sup>), we first PCR amplified a region spanning 1.1  
474 kb upstream and 1.1 kb downstream of the AHH motif (amino acids 562-4 in  
475 NP\_797794.1) and inserted it into the MCS of the suicide vector pDM4<sup>48</sup> (generating  
476 pDM4:*vp1415*), using the Gibson assembly method. We then used site-directed  
477 mutagenesis to replace the codons encoding histidines 563-4 with alanines, to generate  
478 pDM4:*vp1415*<sup>AAA</sup>. pDM4:*vp1415*<sup>AAA</sup> was introduced into *V. parahaemolyticus* POR1 via  
479 tri-parental mating, and trans-conjugants were selected on MMM agar plates  
480 supplemented with chloramphenicol (10  $\mu$ g/mL). The resulting trans-conjugants were  
481 grown on MMM agar plates containing sucrose (20% wt/vol) for counterselection and loss  
482 of the *sacB*-containing pDM4. The resulting *V. parahaemolyticus* POR1 *vp1415*<sup>AAA</sup> strain  
483 was confirmed by amplifying and sequencing the relevant genomic region.

484 The construction of in-frame deletions of *vp1391*, *vp1407*, *tfoY* (*vp1028*), and *hcp1*  
485 (*vp1393*) in *V. parahaemolyticus* POR1, *hcp1* (*b5c30\_rs15290*) in *V. parahaemolyticus*  
486 12-297/B, and *hcp1* (*v12g01\_01540*) and *hcp2* (*v12g01\_07583*) in *V. alginolyticus* 12G01  
487 were described previously<sup>25,28,30,33</sup>. The triple mutant *V. parahaemolyticus* POR1  
488  $\Delta 3x$ Regulators ( $\Delta vp1391/\Delta vp1407/\Delta tfoY$ ) strain was constructed using the same pDM4  
489 plasmids used previously to generate the single deletion mutants (pDM4:*vp1391*,  
490 pDM4:*vp1407*, and pDM4:*tfoY*). Deletions was performed sequentially, as previously  
491 described<sup>25</sup>.

492 For in-frame deletion of *V. natriegens* *tfoY* (*m272\_rs24650*), *V. parahaemolyticus* 04.2548  
493 *hcp1* (*ba740\_rs16850*), and *A. jandaei* DSM 7311 *tssB* (*bn1126\_rs13720*), their  
494 respective 1 kb upstream and 1 kb downstream regions were cloned into the pDM4 MCS  
495 using restriction enzyme digestion and ligation. Plasmids were introduced into the  
496 respective strains and deletions were performed as previously described<sup>25</sup>.



497 To construct *Vnat*<sup>Reg</sup>, the 1 kb upstream and the 1 kb downstream of *V. natriegens dns*  
498 gene (*pn96\_00865*) were first cloned into pDM4 using restriction digestion and ligation,  
499 to generate pDM4:*dns*<sup>*Vnat*</sup>, into which sequences that we used to replace *dns* could be  
500 introduced. Next, the regions spanning the *araC* CDS to the *rrnT1* terminator were PCR  
501 amplified from pBAD/*Myc*-His plasmids into which *vp1407* or *vp1409-7* were introduced  
502 using the Gibson assembly method to generate pVP1407 and pVP1409-7, respectively.  
503 The amplified regions were inserted into pDM4:*dns*<sup>*Vnat*</sup> between the *dns* 1 kb upstream  
504 and 1 kb downstream regions, using restriction digestion and ligation, to generate  
505 pDM4:*dns*<sup>*Vnat*</sup><sub>*vp1407*</sub> and pDM4:*dns*<sup>*Vnat*</sup><sub>*vp1409-7*</sub>, respectively. Next,  
506 pDM4:*dns*<sup>*Vnat*</sup><sub>*vp1409-7*</sub> was introduced into *V. natriegens* via tri-parental mating, and  
507 trans-conjugates in which the *dns* CDS had been replaced by the *araC+vp1409-7*  
508 cassette were obtained as described above (generating *Vnat*<sup>*dns::araC+vp1409-7*</sup>). Finally, we  
509 introduced pDM4:*dns*<sup>*Vnat*</sup><sub>*vp1407*</sub> into *Vnat*<sup>*dns::araC+vp1409-7*</sup> and selected for trans-  
510 conjugates in which the *araC+vp1407* cassette was present between the *dns* 1 kb  
511 upstream and 1 kb downstream regions in the chromosome (generating *Vnat*<sup>Reg</sup>)  
512 ([Supplementary Fig. S1H](#)).

513

#### 514 **Bacterial competition assays**

515 Bacterial competitions were performed as described previously <sup>25</sup>. Briefly, attacker and  
516 prey strains were grown overnight in liquid media (MLB at 30 °C for *V. parahaemolyticus*,  
517 *V. natriegens*, and *V. alginolyticus*; 2xYT at 37 °C for *E. coli*; LB at 30 °C for *V. vulnificus*  
518 and *A. jandaei*, and at 37 °C for *S. enterica*), supplemented with antibiotics when  
519 maintenance of plasmids was required. Cultures were normalized to OD<sub>600</sub> = 0.5 and  
520 were mixed at a 4:1 (attacker:prey) ratio when only a single prey strain was used. For  
521 bacterial competitions in which 5 different prey strains were mixed together, the attacker  
522 and prey were mixed at a 10:1:1:1:1 (Attacker:*E. coli*:*V. vulnificus*:*A. jandaei*:*S.*  
523 *enterica*:*V. natriegens*) ratio. Triplicates of each competition mixture were spotted on LB,  
524 MLB, or MLB supplemented with 0.1% (w/v) L-arabinose (when expression from *Pbad*  
525 promoter was required) agar plates and incubated for 4 h or 24 h at 23, 28, 30, or 37 °C,  
526 as indicated. Prey viability was determined as colony forming unit (CFU) counts at the  
527 indicated timepoints. When necessary, prey strains contained plasmids to provide a  
528 selection marker (for *V. natriegens*: pBAD/*Myc*-His, pBAD18, or pCLTR; for *V.*  
529 *parahaemolyticus*, *V. alginolyticus*, and *A. jandaei*: pBAD18; for *E. coli*: pBAD18 or  
530 pTnp1222). Assays were repeated two to three times with similar results; the results from  
531 a representative experiment are shown.

532

#### 533 **VgrG1 expression and secretion assay**

534 Expression and secretion of VgrG1, a hallmark secreted protein of VpT6SS1, were  
535 determined as described previously <sup>31</sup>, with minor modifications. The indicated *V.*  
536 *parahaemolyticus* and *V. natriegens* strains were grown overnight in MLB media



537 supplemented with appropriate antibiotics to maintain the plasmids. Cultures were  
538 normalized to  $OD_{600} = 0.18$  in the same media, and L-arabinose (0.1% w/v) was added  
539 to induce expression from *Pbad* promoters, where indicated. 20  $\mu\text{M}$  of Phenamil (an  
540 inhibitor of the polar flagella used to mimic surface sensing activation<sup>25</sup>) was added to  
541 induce T6SS1, where indicated. Normalized cultures were grown for 5 h (for *V.*  
542 *parahaemolyticus*) or 3.5 h (for *V. natriegens*, unless otherwise stated) at 30 °C or 28 °C,  
543 as indicated, with constant shaking. To determine the expression of VgrG1 (cells), 1.0  
544  $OD_{600}$  units were pelleted and cells were resuspended in 2x Tris-glycine SDS sample  
545 buffer (Novex, Life Sciences). For secreted fractions (media), 10  $OD_{600}$  units were  
546 pelleted and the supernatants were filtered (0.22  $\mu\text{m}$ ). Proteins were precipitated from the  
547 supernatants using sodium deoxycholate and trichloro acetic acid<sup>49</sup>. Protein precipitates  
548 were washed twice with cold acetone and air-dried. Finally, the precipitates were  
549 resuspended in 20  $\mu\text{L}$  of 150 mM Tris-Cl (pH=8.0), followed by the addition of 20  $\mu\text{L}$  of 2x  
550 Tris-glycine SDS sample buffer (Novex, Life Sciences). Expression and secretion  
551 samples were incubated at 95 °C for 10 minutes and then resolved on TGX Stain-free gel  
552 (Bio-Rad). Next, proteins were transferred onto nitrocellulose membranes using Trans-  
553 Blot Turbo Transfer (Bio-Rad). Membranes were immunoblotted with custom-made anti-  
554 VgrG1 antibodies<sup>31</sup> at 1:1000 dilution. The loading of total protein lysates was visualized  
555 by analyzing trihalo compounds' fluorescence of the immunoblot membrane. Protein  
556 signals were visualized using an enhanced chemiluminescence (ECL) substrate. The  
557 experiments were repeated two to three times with similar results. Results from a  
558 representative experiment are shown.

559

## 560 **Quantitative RT-PCR**

561 *V. parahaemolyticus* isolates were grown overnight in MLB. The media were  
562 supplemented with antibiotics when it was appropriate to maintain plasmids. Overnight  
563 cultures were normalized to  $OD_{600} = 0.18$  in 5 mL MLB and then grown at 30 °C for 2 h.  
564 Phenamil (20  $\mu\text{M}$ ) was added to induce the expression of the VpT6SS1 genes<sup>25</sup>. When  
565 required, media were supplemented with 0.1% (w/v) L-arabinose to express plasmid-  
566 encoded genes regulated by *Pbad* promoters. Cells equivalent to 1.0  $OD_{600}$  units were  
567 harvested and washed with RNAprotect Bacteria Reagent (Qiagen). Next, RNA was  
568 isolated from the pelleted bacteria using the Bacterial RNA kit (Biomiga), following the  
569 manufacturer's instructions. Complementary DNA (cDNA) was synthesized from isolated  
570 RNA (1  $\mu\text{g}$ ) using the SuperScript III First-Strand Synthesis System for RT-PCR kit  
571 (Invitrogen), following the manufacturer's instructions. Random hexamer primer mix  
572 (Invitrogen) was used for cDNA synthesis. For RT-PCR, 2 ng template cDNA were mixed  
573 (in triplicate) with forward and reverse primers (300 nM each) and with 2x Fast SYBR  
574 Green Master Mix (Applied Biosystems). The RT-PCR and analysis were carried out  
575 using a QuantStudio 12K Flex instrument and software (Applied Biosystems). 16s rRNA  
576 was used as the endogenous control and the differential gene expression, reported as  
577 the fold change, were analyzed by the  $2^{-\Delta\Delta\text{Ct}}$  method. Primer sets were designed using

578 the Primer3web server <sup>50</sup> to amplify a representative gene from each VpT6SS1 cluster  
579 operon (i.e., *vp1386*, *vp1388*, *vp1392*, *vp1393*, *vp1406*, *vp1409*, and *vp1414*, as detailed  
580 in [Supplementary Table S3](#)).

581

## 582 **Bacterial growth assays**

583 Overnight-grown cultures of *V. natriegens* were normalized to an OD<sub>600</sub> of 0.01 in MLB  
584 media and transferred to 96-well plates (200 µL per well; n = 4). Cultures were grown at  
585 the indicated temperatures in a BioTek SYNERGY H1 microplate reader with constant  
586 shaking at 205 cpm. OD<sub>600</sub> readings were acquired every 10 min.

587

## 588 **T6SS sheath assembly**

589 pTssB1-sfGFP, a plasmid for the arabinose-inducible expression of the VpT6SS1 sheath  
590 protein TssB1 (VP1402) fused to sfGFP, was introduced via conjugation into *Vnat*<sup>fReg</sup>  
591 strains carrying pT6SS1<sup>effectorless</sup> or pT6SS1<sup>effectorless/Δhcp1</sup>. Bacteria were grown overnight  
592 in MLB media supplemented with appropriate antibiotics to maintain the plasmids, and  
593 cultures were then normalized to OD<sub>600</sub> = 0.18 in MLB media supplemented with  
594 antibiotics and 0.1% (w/v) L-arabinose. Normalized cultures were grown for 3 h at 28 °C,  
595 and 100 µL of each culture were harvested and washed with M9 media twice. Next, cells  
596 were resuspended in 100 µL of M9 media, and 1 µL of bacterial suspensions were spotted  
597 onto MLB-agarose (1.5% w/v) pads supplemented with 0.1% (w/v) L-arabinose. Pads  
598 were allowed to dry for 5 minutes and then placed face-down in 35mm glass-bottom  
599 Cellview cell culture dishes. Bacteria were imaged in a Nikon Eclipse Ti2-E inverted  
600 motorized microscope equipped with a CFI PLAN apochromat DM 100X oil lambda PH-  
601 3 (NA, 1.45) objective lens, a Lumencor SOLA SE II 395 light source, and ET-EGFP  
602 (#49002, used to visualize the GFP signal) filter sets. Images were acquired using a DS-  
603 QI2 Mono cooled digital microscope camera (16 MP), and were postprocessed using Fiji  
604 ImageJ suite <sup>51</sup>.

605

## 606 **Statistical analysis**

607 Data were analyzed with GraphPad Prism 9 and Microsoft Excel, using unpaired, two-  
608 tailed Student's *t*-test, unless otherwise indicated. Differences of *P* < 0.05 were  
609 considered significant.

610 **CONFLICT OF INTEREST**

611 A pending patent application was filed in the US regarding this manuscript.

612

613 **ACKNOWLEDGMENTS**

614 This project received funding from the European Research Council (ERC) under the  
615 European Union's Horizon 2020 research and innovation program (Grant agreement No.  
616 714224), and the Israel Science Foundation (ISF; grant no. 920/17) to DS. We thank  
617 members of the Salomon lab for technical assistance and helpful discussions. We also  
618 wish to thank Udi Qimron and Eran Bosis for their critical reading of the manuscript, as  
619 well as Karla Satchell, Swapan Banerjee, Udi Qimron, and Ohad Gal-Mor for providing  
620 bacterial strains, and Eric V. Stabb for providing bacterial strains and plasmids. Panels in  
621 Figures 1, 2, 4, and 5, and in Supplementary Figure S1 were created using  
622 BioRender.com.

623 **REFERENCES**

- 624 1. World Health Organization. Antibiotic resistance. [https://www.who.int/news-](https://www.who.int/news-room/fact-sheets/detail/antibiotic-resistance)  
625 [room/fact-sheets/detail/antibiotic-resistance](https://www.who.int/news-room/fact-sheets/detail/antibiotic-resistance) (2018).
- 626 2. WHO & World Health Organization. *Antimicrobial resistance. Global Report on*  
627 *Surveillance. World Health Organization* 232 (2014). doi:10.1007/s13312-014-  
628 0374-3.
- 629 3. Martin, M. J., Thottathil, S. E. & Newman, T. B. Antibiotics overuse in animal  
630 agriculture: A call to action for health care providers. *American Journal of Public*  
631 *Health* vol. 105 2409–2410 (2015).
- 632 4. Manyi-Loh, C., Mamphweli, S., Meyer, E. & Okoh, A. Antibiotic use in agriculture  
633 and its consequential resistance in environmental sources: Potential public health  
634 implications. *Molecules* vol. 23 (2018).
- 635 5. Shallcross, L. J. Editorials: Antibiotic overuse: A key driver of antimicrobial  
636 resistance. *British Journal of General Practice* vol. 64 604–605 (2014).
- 637 6. Vezzulli, L. *et al.* Climate influence on *Vibrio* and associated human diseases  
638 during the past half-century in the coastal North Atlantic. *Proc. Natl. Acad. Sci.*  
639 **113**, E5062–E5071 (2016).
- 640 7. Furfaro, L. L., Payne, M. S. & Chang, B. J. Bacteriophage therapy: clinical trials  
641 and regulatory hurdles. *Front. Cell. Infect. Microbiol.* **8**, 376 (2018).
- 642 8. Kumariya, R. *et al.* Bacteriocins: Classification, synthesis, mechanism of action  
643 and resistance development in food spoilage causing bacteria. *Microb. Pathog.*  
644 **128**, 171–177 (2019).
- 645 9. Yang, S. C., Lin, C. H., Sung, C. T. & Fang, J. Y. Antibacterial activities of  
646 bacteriocins: application in foods and pharmaceuticals. *Front. Microbiol.* **5**, 241  
647 (2014).
- 648 10. López-Igual, R., Bernal-Bayard, J., Rodríguez-Patón, A., Ghigo, J.-M. & Mazel, D.  
649 Engineered toxin–intein antimicrobials can selectively target and kill antibiotic-  
650 resistant bacteria in mixed populations. *Nat. Biotechnol.* **37**, 755–760 (2019).
- 651 11. Goren, M., Yosef, I. & Qimron, U. Sensitizing pathogens to antibiotics using the  
652 CRISPR-Cas system. *Drug Resist. Updat.* **30**, 1–6 (2017).
- 653 12. Pursey, E., Sünderhauf, D., Gaze, W. H., Westra, E. R. & van Houte, S. CRISPR-  
654 Cas antimicrobials: Challenges and future prospects. *PLOS Pathog.* **14**,  
655 e1006990 (2018).
- 656 13. Hibbing, M. E., Fuqua, C., Parsek, M. R. & Peterson, S. B. Bacterial competition:  
657 surviving and thriving in the microbial jungle. *Nat. Rev. Microbiol.* **8**, 15–25 (2010).
- 658 14. Mougous, J. D. *et al.* A virulence locus of *Pseudomonas aeruginosa* encodes a  
659 protein secretion apparatus. *Science.* **312**, 1526–1530 (2006).
- 660 15. Pukatzki, S. *et al.* Identification of a conserved bacterial protein secretion system

- 661 in *Vibrio cholerae* using the Dictyostelium host model system. *Proc. Natl. Acad.*  
662 *Sci.* **103**, 1528–1533 (2006).
- 663 16. Jana, B. & Salomon, D. Type VI secretion system: a modular toolkit for bacterial  
664 dominance. *Future Microbiol.* **14**, fmb-2019-0194 (2019).
- 665 17. Hood, R. D., Peterson, S. B. & Mougous, J. D. From striking out to striking gold:  
666 discovering that Type VI secretion targets bacteria. *Cell Host Microbe* **21**, 286–  
667 289 (2017).
- 668 18. Alcoforado Diniz, J., Liu, Y. C. & Coulthurst, S. J. Molecular weaponry: Diverse  
669 effectors delivered by the Type VI secretion system. *Cell. Microbiol.* **17**, 1742–  
670 1751 (2015).
- 671 19. LaCourse, K. D. *et al.* Conditional toxicity and synergy drive diversity among  
672 antibacterial effectors. *Nat. Microbiol.* **3**, 440–446 (2018).
- 673 20. Ting, S. Y. *et al.* Targeted Depletion of bacteria from mixed populations by  
674 programmable adhesion with antagonistic competitor cells. *Cell Host Microbe* **28**,  
675 313-321.e6 (2020).
- 676 21. Hoff, J. *et al.* *Vibrio natriegens*: an ultrafast-growing marine bacterium as  
677 emerging synthetic biology chassis. *Environ. Microbiol.* 1462-2920.15128 (2020)  
678 doi:10.1111/1462-2920.15128.
- 679 22. Weinstock, M. T., Heseck, E. D., Wilson, C. M. & Gibson, D. G. *Vibrio natriegens*  
680 as a fast-growing host for molecular biology. *Nat. Methods* **13**, 849–851 (2016).
- 681 23. Lee, H. H. *et al.* *Vibrio natriegens*, a new genomic powerhouse. *bioRxiv* 058487  
682 (2016) doi:10.1101/058487.
- 683 24. Dar, Y., Salomon, D. & Bosis, E. The antibacterial and anti-eukaryotic Type VI  
684 secretion system MIX-effector repertoire in *Vibrionaceae*. *Mar. Drugs* **16**, 433  
685 (2018).
- 686 25. Salomon, D., Gonzalez, H., Updegraff, B. L. & Orth, K. *Vibrio parahaemolyticus*  
687 Type VI secretion system 1 is activated in marine conditions to target bacteria,  
688 and is differentially regulated from system 2. *PLoS One* **8**, e61086 (2013).
- 689 26. Salomon, D. *et al.* Marker for Type VI secretion system effectors. *Proc. Natl.*  
690 *Acad. Sci.* **111**, 9271–9276 (2014).
- 691 27. Salomon, D., Klimko, J. A. & Orth, K. H-NS regulates the *Vibrio parahaemolyticus*  
692 Type VI secretion system 1. *Microbiol. (United Kingdom)* **160**, 1867–1873 (2014).
- 693 28. Jana, B., Fridman, C. M., Bosis, E. & Salomon, D. A modular effector with a  
694 DNase domain and a marker for T6SS substrates. *Nat. Commun.* **10**, 3595  
695 (2019).
- 696 29. Fridman, C. M., Keppel, K., Gerlic, M., Bosis, E. & Salomon, D. A comparative  
697 genomics methodology reveals a widespread family of membrane-disrupting  
698 T6SS effectors. *Nat. Commun.* **11**, 1085 (2020).



- 699 30. Salomon, D. *et al.* Type VI secretion system toxins horizontally shared between  
700 marine bacteria. *PLoS Pathog.* **11**, 1–20 (2015).
- 701 31. Li, P. *et al.* Acute aepatopancreatic necrosis disease-causing *Vibrio*  
702 *parahaemolyticus* strains maintain an antibacterial Type VI secretion system with  
703 versatile effector repertoires. *Appl. Environ. Microbiol.* **83**, e00737-17 (2017).
- 704 32. Metzger, L. C., Matthey, N., Stoudmann, C., Collas, E. J. & Blokesch, M.  
705 Ecological implications of gene regulation by TfoX and TfoY among diverse *Vibrio*  
706 species. *Environ. Microbiol.* **21**, 2231–2247 (2019).
- 707 33. Ben-Yaakov, R. & Salomon, D. The regulatory network of *Vibrio*  
708 *parahaemolyticus* Type VI secretion system 1. *Environ. Microbiol.* **21**, 2248–2260  
709 (2019).
- 710 34. Guzman, L. M., Belin, D., Carson, M. J. & Beckwith, J. Tight regulation,  
711 modulation, and high-level expression by vectors containing the arabinose  
712 P(BAD) promoter. *J. Bacteriol.* **177**, 4121–4130 (1995).
- 713 35. Austin, B. Taxonomy of bacterial fish pathogens. *Veterinary Research* vol. 42 1–  
714 13 (2011).
- 715 36. Baker-Austin, C. *et al.* *Vibrio* spp. infections. *Nat. Rev. Dis. Prim.* **4**, 1–19 (2018).
- 716 37. Ponce-Palafox, J., Martinez-Palacios, C. A. & Ross, L. G. The effects of salinity  
717 and temperature on the growth and survival rates of juvenile white shrimp,  
718 *Penaeus vannamei*, Boone, 1931. *Aquaculture* **157**, 107–115 (1997).
- 719 38. Wyban, J., Walsh, W. A. & Godin, D. M. Temperature effects on growth, feeding  
720 rate and feed conversion of the Pacific white shrimp (*Penaeus vannamei*).  
721 *Aquaculture* **138**, 267–279 (1995).
- 722 39. Banerjee, S., Petronella, N., Chew Leung, C. & Farber, J. Draft genome  
723 sequences of four *Vibrio parahaemolyticus* isolates from clinical cases in Canada.  
724 *Genome Announc.* **3**, (2015).
- 725 40. Boyer, F., Fichant, G., Berthod, J., Vandenbrouck, Y. & Attree, I. Dissecting the  
726 bacterial Type VI secretion system by a genome wide in silico analysis: What can  
727 be learned from available microbial genomic resources? *BMC Genomics* **10**,  
728 (2009).
- 729 41. PAYNE, W. J. Studies on bacterial utilization of uronic acids. III. Induction of  
730 oxidative enzymes in a marine isolate. *J. Bacteriol.* **76**, 301–307 (1958).
- 731 42. Hersch, S. J. *et al.* Envelope stress responses defend against Type six secretion  
732 system attacks independently of immunity proteins. *Nat. Microbiol.* **5**, 706–714  
733 (2020).
- 734 43. Le, N. H. *et al.* Peptidoglycan editing provides immunity to *Acinetobacter*  
735 *baumannii* during bacterial warfare. *Sci. Adv.* **6**, eabb5614 (2020).
- 736 44. Crisan, C. V. *et al.* Glucose confers protection to *Escherichia coli* against

- 737 contact killing by *Vibrio cholerae*. *Sci. Rep.* **11**, 2935 (2021).
- 738 45. Lin, H. H., Filloux, A. & Lai, E. M. Role of recipient susceptibility factors during  
739 contact-dependent interbacterial competition. *Frontiers in Microbiology* vol. 11  
740 2768 (2020).
- 741 46. Gibson, D. G. *et al.* Enzymatic assembly of DNA molecules up to several hundred  
742 kilobases. *Nat. Methods* **6**, 343–345 (2009).
- 743 47. Dunn, A. K., Millikan, D. S., Adin, D. M., Bose, J. L. & Stabb, E. V. New *rfp*- and  
744 pES213-derived tools for analyzing symbiotic *Vibrio fischeri* reveal patterns of  
745 infection and *lux* expression in situ. *Appl. Environ. Microbiol.* **72**, 802–810 (2006).
- 746 48. O’Toole, R., Milton, D. L. & Wolf-Watz, H. Chemotactic motility is required for  
747 invasion of the host by the fish pathogen *Vibrio anguillarum*. *Mol. Microbiol.* **19**,  
748 625–637 (1996).
- 749 49. Bensadoun, A. & Weinstein, D. Assay of proteins in the presence of interfering  
750 materials. *Anal. Biochem.* **70**, 241–250 (1976).
- 751 50. Untergasser, A. *et al.* Primer3-new capabilities and interfaces. *Nucleic Acids Res.*  
752 **40**, e115–e115 (2012).
- 753 51. Schindelin, J. *et al.* Fiji: an open-source platform for biological-image analysis.  
754 *Nat. Methods* **9**, 676–682 (2012).
